# ZeBox: A novel non-intrusive continuous-use technology to trap and kill airborne microbes

Kruttika S. Phadke<sup>1,2</sup>, Deepak G. Madival<sup>1,3</sup>, Janani Venkataraman<sup>1</sup>, Debosmita Kundu<sup>1</sup>, K. S. Ramanujan<sup>1</sup>, Nisha Holla<sup>1</sup>, Jaywant Arakeri<sup>3</sup>, Gaurav Tomar<sup>3</sup>, Santanu Datta<sup>1,4</sup>, and Arindam Ghatak \*<sup>1</sup>

<sup>1</sup>*Biomoneta Research Private Limited, Bangalore, India 560065*

<sup>2</sup>*Department of Veterinary Microbiology and Preventive Medicine, Iowa State University, Ames, IA, 50011, USA*

<sup>3</sup>*Mechanical engineering department, Indian Institute of Science, Bangalore, India 560012*

<sup>4</sup>*Bugworks Research, Bangalore, India 560066*

April 16, 2021

Abstract = 150 words (limit = 150)

Introduction(517)+ Results(2141)+Discussion (394) = 3052 words (limit = 3000)

Figures(6)+Tables(2) = 8 (limit = 7)

References = 53 (limit = 50)

## 1 Abstract

2 Preventing nosocomial infection is a major unmet need of our times. Existing  
3 air decontamination technologies suffer from demerits such as toxicity of  
4 exposure, species specificity, noxious gas emission, environment-dependent  
5 performance and high power consumption. Here, we present a novel  
6 technology called "ZeBox" that transcends the conventional limitations and  
7 achieves high microbicidal efficiency. In ZeBox, a non-ionizing electric field  
8 extracts naturally charged microbes from flowing air and deposits them on  
9 engineered microbicidal surfaces. The surface's three dimensional topography  
10 traps the microbes long enough for them to be inactivated. The electric field  
11 and chemical surfaces synergistically achieve rapid inactivation of a broad  
12 spectrum of microbes. ZeBox achieved near complete kill of airborne microbes  
13 in challenge tests (5-9 log reduction) and >90% efficiency in a fully functional  
14 stem cell research facility in the presence of humans. Thus, ZeBox fulfills the  
15 dire need for a real-time, continuous, safe, trap-and-kill air decontamination  
16 technology.

---

\*Corresponding author: arindam@biomoneta.com

## 17 1 Introduction

18 Microbial load (bacteria, viruses, spores and fungi) in our living, working and  
19 hospital space must be reduced to mitigate the transmission of airborne  
20 infections. As per CDC (Center for Disease Control, USA)'s recommendation  
21 (<https://www.cdc.gov/niosh/topics/hierarchy/default.html>), eliminating  
22 microbes at the source as and when produced is the first line of defense against  
23 spread of infections. Filtration, electrostatic precipitation, bactericidal gas  
24 spraying, ultra-violet germicidal irradiation (UVGI, employing  $\sim 254$  nm  
25 radiation), plasma discharge and photo-catalytic oxidation (PCO) are the  
26 currently available air decontamination technologies [1]. While some are  
27 microbicidal, others only trap microbes. Filtration [2] and electrostatic  
28 precipitation [3] belong to the latter category. Microbes trapped inside filters  
29 can multiply in situ [4, 5, 6, 7, 8]; such filters are detrimental to indoor air  
30 quality and hazardous during their disposal. They also offer high flow  
31 resistance which translates to high operating power consumption [9, 10].  
32 Electrostatic precipitation uses electric field to attract and trap aerosols  
33 pre-charged by corona discharge, but which produces noxious gases like ozone  
34 [3, 11]. Its microbicidal action is dubious; in fact electrostatic bioaerosol  
35 samplers capture microbes that remain viable [12, 13, 14]. However, because of  
36 its low flow resistance, it consumes less power per unit of clean air delivered  
37 compared to filtration [3]. Filters made of anti-bacterial fibers have also been  
38 developed [15, 16, 17, 18, 19, 20] but their performance remains to be proven  
39 under realistic indoor conditions.

40 Bactericidal gas spraying, UVGI, plasma discharge and PCO are  
41 microbicidal technologies. Although bactericidal gases and UVGI can sterilize  
42 an entire room, they cannot be deployed in human presence. UVGI is used to  
43 sterilize upper room air and air circulating through ventilation ducts.  
44 However, microbicidal action of UVGI depends on environmental parameters  
45 such as humidity [21, 22, 23], is species-specific [24] and requires a minimum  
46 duration of exposure to microbes [25]. Exposure of humans to UVGI (due to  
47 faulty design, deployment or use of UVGI devices) can damage their eyes and  
48 skin [26, 27, 28, 29]. UVGI is used to kill microbes trapped on a filter's surface  
49 [30, 31] but then it cannot reach microbes residing beneath the surface.  
50 Plasma discharge [32] and PCO [34, 35] both generate ions and/or reactive  
51 species, respectively using gas discharge and reaction with an irradiated  
52 catalyst. However, they also generate  $\text{NO}_x$  and ozone [1] and additional  
53 methods are necessary to mitigate them [33]. In PCO, convection of gas to the  
54 catalyst and the subsequent adsorption, reaction and release of reactive species  
55 into the bulk flow is the bottleneck process [36], which results in low clean air  
56 delivery rates [1].

57 Given the importance of eliminating airborne infection, a technology  
58 that is safe, suitable for continuous use and efficient against a wide variety of  
59 airborne microbes is desirable. Here, we describe such a novel technology called  
60 "ZeBox"; the name derives from the **Z**eta-potential possessed by microbes,  
61 which property is pivotal in trapping them inside the **B**ox-shaped device. In  
62 the following, we discuss the working mechanism of ZeBox and demonstrate its  
63 efficacy in chamber tests and field studies against a variety of microbes.

## 64 2 Results

65 **Electrode plates with engineered chemical surfaces form the kill**  
66 **cassette.** A row of flat plate electrodes ( $10.9\text{ cm} \times 30\text{ cm}$ ) with alternating  
67 polarity are assembled inside a cuboid shaped box with open ends for  
68 transmitting flow. A three dimensional hydrocellular microbicidal composite  
69 material (US patent no. US 9566363B2, licensed) is layered on to the  
70 electrodes. A non-ionizing  $3\text{ kV/cm}$  electric field is set up between electrodes  
71 by applying direct-current voltage between them. Microbes are trapped and  
72 killed inside this “kill cassette”. Axial fans pull microbe laden ambient air  
73 through the kill cassette and between the electrode-plates, as shown  
74 schematically in figure 1.

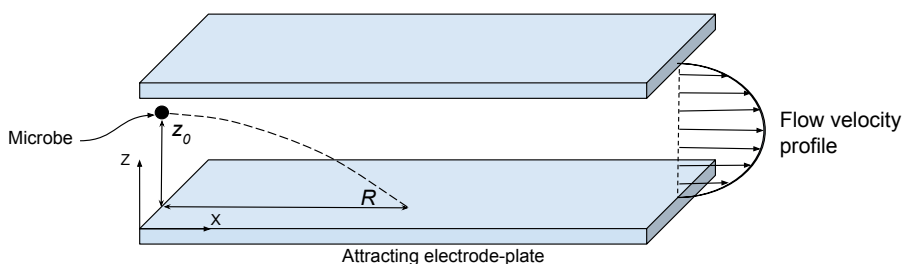

Figure 1: **Microbe in a flow subject to transverse electric field.** A charged microbe deviates from the flow direction due to the electric field between electrode-plates.

75 **Electric field extracts charged microbes from the flow.** Microbes are  
76 naturally charged [38, 39]; therefore, in an electric field, they are impelled  
77 towards the electrode of opposite polarity. Figure 1 depicts this process  
78 schematically. Here,  $X$ -axis points along the flow and  $Z$ -axis points away from  
79 the attracting electrode. A microbe initially at distance  $z_0$  from the attracting  
80 electrode travels a distance  $R$  in the streamwise direction, called its “range”, as  
81 it descends to  $z = 0$ . Whether or not the microbe hits the electrode depends  
82 on its length, the microbe’s initial distance  $z_0$ , strength of the electric field,  
83 charge on the microbe and the type of flow (laminar or turbulent). The  
84 Reynolds number for the flow between electrodes in ZeBox is  $\sim 10^3$  and a  
85 rectangular duct flow (or even plane Poiseuille flow) undergoes transition at  
86 this Reynolds number and could be turbulent [40, 41]. Analyzing microbe’s  
87 motion in a turbulent flow is difficult because of its complicated, stochastic  
88 nature; supplementary information S1 analyzes microbe’s motion and its  
89 maximum range in a laminar flow instead.

90 Earlier studies on resuspension of dust from flat surfaces due to a flow  
91 show that, whenever the hydrodynamic force and torque exerted by the flow  
92 exceed those that keep the particles attached to the surface (for example, Van  
93 der Waals force), the particles can either detach by lifting off or slide and roll  
94 on the surface [42, 43]. In our case, lifting off of microbes from the electrode is  
95 unlikely due to the strong electric field, but they can nevertheless slide and roll  
96 and thus escape away due to the electrode’s finite length (refer figure 2). Since  
97 the microbicidal surface requires a minimum duration of contact to inactivate

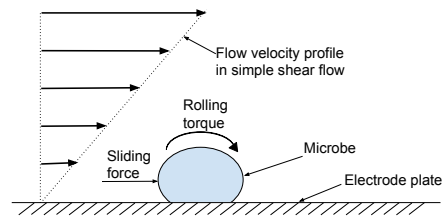

Figure 2: **Microbe sliding and rolling on a flat surface.** Microbes can slide and roll over a flat surface due to hydrodynamic force and torque exerted by the flow.

98 microbes depending on how sensitive or hardy it is, a fraction of the deposited  
99 microbes could escape while still viable. Therefore, the ability of the  
100 microbicidal surface to trap and hold microbes until they are inactivated  
101 becomes important.

102 **Three dimensional topography of the microbicidal surface traps the**  
103 **microbe.** The microbicidal surface employed in ZeBox has a highly uneven  
104 topography at the microbial scale, populated with well-like depressions to trap  
105 and hold microbes. Figures 3a and 3b show the scanning electron microscope  
106 (SEM) images of the surface at different magnifications appropriate to the  
107 microbial scale. Figure 3c shows streamlines in a numerically simulated two  
108 dimensional flow (using OpenFOAM-7) over a surface with square shaped  
109 wells, to qualitatively illustrate the kind of flow obtained over an uneven  
110 topography. A simple shear flow was imposed on the flow domain (refer figure  
111 3c) by moving its uppermost boundary horizontally at constant speed. The  
112 flow Reynolds number based on the imposed shear rate and the dimension of  
113 the square-shaped well is  $\sim 10^{-5}$ , which is appropriate to the flow in the  
114 neighborhood of the microbicidal surface in ZeBox. The important feature of  
115 the flow for our purpose is the recirculating region set up within the wells, in  
116 which the streamlines of the flow form closed loops. This feature is quite  
117 general for a flow over an uneven topography and which presumably enhances  
118 the efficacy of the microbicidal surface further in regard to trapping microbes.  
119 Once the microbe falls into one of the wells, brought there either in the course  
120 of its rolling over the surface or directly by the electric field, the recirculating  
121 flow can confine it to the well for a sufficiently long duration.

122 Table 1 shows the efficacy of microbicidal surfaces (in terms of  $\log_{10}$   
123 reduction, where  $n\text{-}\log_{10}$  reduction implies reduction in the initial microbial  
124 load by a factor of  $10^n$ ) with different topographies, which we call 2-D and 3-D  
125 surfaces, in flow experiments. A 2-D surface is a single layer of cotton fabric  
126 while a 3-D surface is a multilayered 90:10 polyethylene : cotton fabric. In the  
127 presence of electric field, 3-D microbicidal surface performs better than the  
128 2-D surface. When the electric field is absent, the microbes are not extracted  
129 from the flow and hence both surfaces perform similarly.

130 **Electric field and chemical microbicidal-surfaces synergistically**  
131 **achieve rapid inactivation of microbes.** In contrast to electrostatic  
132 precipitators, the applied electric field in ZeBox plays two roles: it pulls

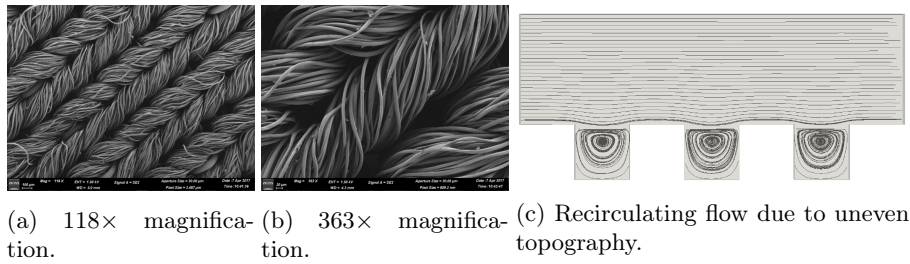

Figure 3: **Topography of the microbicidal surface at microbial scale.** SEM photographs revealing the highly uneven topography of microbicidal surface and the expected flow patterns over it.

|                        | Microbial load reduction ( $\log_{10}$ scale) |                 |
|------------------------|-----------------------------------------------|-----------------|
|                        | 3-D surface                                   | 2-D surface     |
| Without electric field | $2.82 \pm 0.74$                               | $2.13 \pm 0.2$  |
| With electric field    | $9.42 \pm 1.02$                               | $4.68 \pm 0.88$ |

Table 1: **Effect of surface topography on microbicidal action.**  $\log_{10}$ -reduction in viable microbial load (*E. coli*) achieved by ZeBox with 3-D and 2-D microbicidal surfaces in 10 minutes. Applied electric field = 3 kV/cm. Superscripts show standard deviation.

| Time (mins) | Microbial load reduction ( $\log_{10}$ scale) |                        |
|-------------|-----------------------------------------------|------------------------|
|             | With electric field                           | Without electric field |
| 2           | $3.00 \pm 0.39$                               | $0.87 \pm 0.44$        |
| 5           | $5.71 \pm 0.19$                               | $1.86 \pm 0.78$        |
| 10          | $8.83 \pm 0.69$                               | $2.56 \pm 1.17$        |

Table 2: **Effect of applied electric field on the efficacy of microbicidal surface.** Effect of 3 kV/cm electric field on the  $\log_{10}$ -reduction in viable microbial load (*E. coli*) over the microbicidal surface in spot experiments. Superscripts show standard deviation.

133 microbes from the flow on to the microbicidal surface and then accelerates  
 134 their subsequent inactivation. Table 2 shows  $\log_{10}$ -reduction in the microbial  
 135 load in spot experiments, with 3 kV/cm electric field applied between  
 136 electrodes. The microbicidal surface achieves the highest reduction in  
 137 microbial load in the presence of the electric field. Quaternary ammonium  
 138 compounds (QAC) are membrane-active agents which inactivate microbes by  
 139 targeting their cytoplasmic membrane [46, 47, 48, 49], but first, they must  
 140 breach the outer cell wall. In the present design, QAC is tethered to the 3-D  
 141 surface by long flexible chains, which presumably helps the QAC to orient  
 142 itself to puncture holes in the microbe. The external electric field increases the  
 143 trans-membrane voltage of the cell above its resting value, leading to an  
 144 electric current that presumably flows through these pores as they form the  
 145 path of least resistance. This current flow may be analogous to the  
 146 electroporation of bacteria in which the pores formed in the cell wall are  
 147 stabilized [50]. The intracellular components then leak from the pores, as is

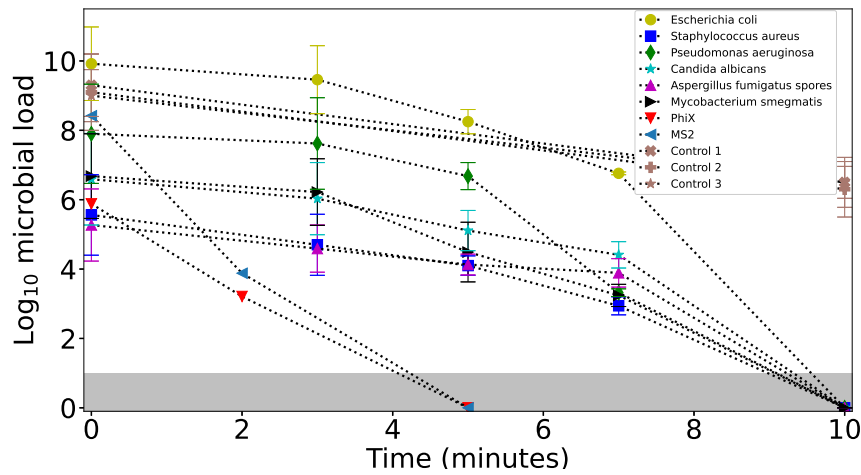

(a) Reduction in microbial load.

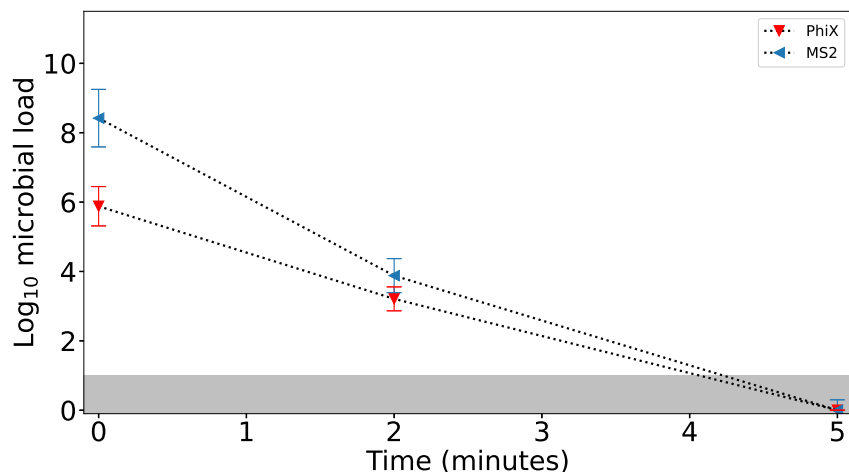

(b) Reduction in viral load.

Figure 4: **Reduction of microbial load in test chamber.** Variation of the  $\log_{10}$  microbial load over time after ZeBox is turned on in the test chamber. The shaded region indicates limit of detection (LoD). Control 1, 2, 3 refer to control experiments employing respectively microbicidal surface without electric field, control surface with electric field and control surface without electric field.

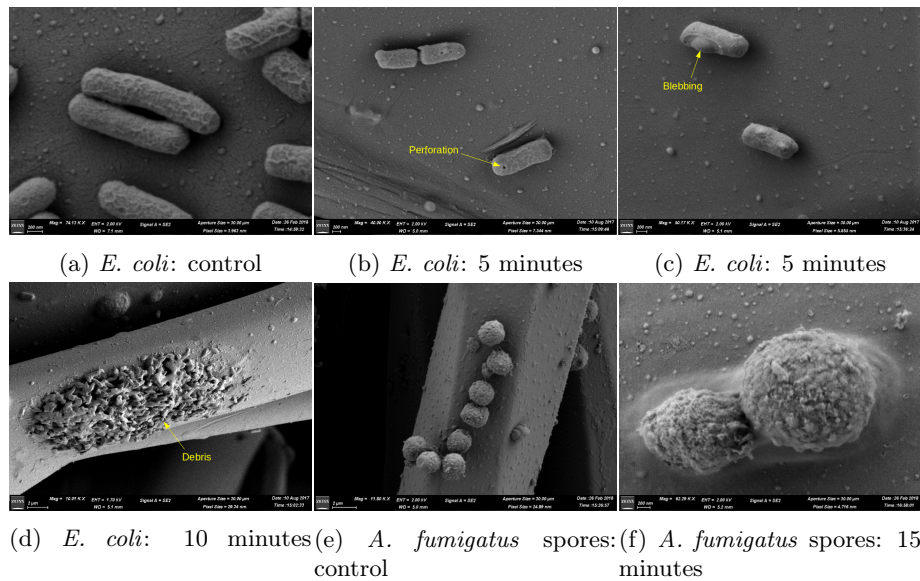

Figure 5: **Microbicidal action of the chemical surface.** SEM images showing microbes on the microbicidal surface being killed by electroporation.

148 seen in the SEM pictures. This process leads to the irreversible killing of the  
149 cells. Therefore, the chemical surface in tandem with the electric field displays  
150 an enhanced electro-chemical microbicidal action compared to what they  
151 would have achieved separately.

152 **ZeBox rapidly reduces microbial load in chamber tests.** The  
153 capability of ZeBox to decontaminate a closed space containing airborne  
154 microbes was determined by challenge tests [51]. A broad spectrum of  
155 microorganisms was employed in the test – standard gram-positive and  
156 gram-negative bacteria of ESKAPE group (*Escherichia coli*, *Staphylococcus*  
157 *aureus*, *Pseudomonas aeruginosa*), mycobacterium species (*Mycobacterium*  
158 *smegmatis*), fungal species (*Aspergillus fumigatus* spores and *Candida*  
159 *albicans*) and virus (PhiX 174 coliphage and MS2 coliphage). Among these,  
160 MS2 virus is an accepted surrogate for the SARS-CoV2 virus [52, 53]. Figure 4  
161 shows the collated data on the variation in  $\log_{10}$  microbial load ( $n$ - $\log_{10}$   
162 microbial load equals  $10^n$  microbes) over time after ZeBox was turned on.  
163 ZeBox proves to be extremely effective in rapidly decreasing the viable  
164 microbial load in a closed space. It achieved 9.9  $\log_{10}$ -reduction (i.e.  
165 99.999999999% reduction) of *E. coli* in 10 minutes ( $n$   $\log_{10}$ -reduction equals  
166 reduction by a factor of  $10^n$ ). For other microbes ZeBox brought about 5 to 9  
167  $\log_{10}$ -reduction (i.e. 99.999-99.9999999% reduction) of the viable microbial  
168 load.

169 **SEM images of microbicidal action.** Scanning electron microscopy  
170 (SEM) studies were done to see how microbes trapped on the microbicidal  
171 surface are killed. *E. coli* and *A. fumigatus* spores were chosen because they  
172 form two extremes on the scale of sensitivity, with spores being hardy. Figure



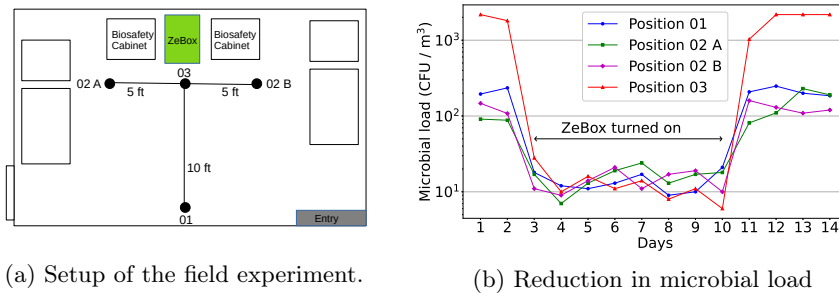

Figure 6: **Field performance of ZeBox.** ZeBox reduces the microbial load in an open room. Measurement locations are indicated by filled circles in the schematic.

173 5a and 5e show the microbes in control conditions. Due to electro-chemical  
174 action at the three dimensional microbicidal surface, their cell membrane  
175 undergoes morphological changes followed by complete degradation. Figure 5b  
176 and 5c, obtained after 5 minutes of contact, reveals puncturing and blebbing  
177 of the *E. coli* cell membrane. Ultimately, the cells burst and their intracellular  
178 contents spill out (figure 5d and 5f) signaling a complete degradation of the  
179 microbes.

180 **ZeBox reduces microbial load in open room.** ZeBox's performance was  
181 also tested in a real life setting, i.e. in a room with constant influx of microbes  
182 from outside or due to internal sources. A working tissue culture laboratory in  
183 a building with central air-conditioning, but without High Efficiency  
184 Particulate Air (HEPA) filters, was chosen for the purpose. Figure 6a shows  
185 the schematic plan-view of the lab and the measurement locations. The  
186 working people in the lab were the primary source of microbial contamination.  
187 Figure 6b shows that the microbial load at location-03 where tissue culture  
188 work was carried out was  $>3000$  CFU/m<sup>3</sup> initially. ZeBox reduced the  
189 microbial load in the lab to  $\sim 10$  CFU/m<sup>3</sup> within about 3 hours after it was  
190 turned on. This low level was consistently maintained so long as ZeBox was  
191 operational. When it was turned off at day 10, the microbial load rebounded  
192 to its original level. During its operation, ZeBox effectively decontaminated a  
193 zone of dimensions  $\sim 10$  feet  $\times$  10 feet (refer figure 6a), which demonstrates its  
194 potential to decontaminate a smaller region of interest in a relatively large  
195 open room, with continuous movement of personnel and without needing  
196 physical partitions.

197 **ZeBox does not produce ozone.** Since ZeBox employs non-ionizing  
198 electric field, it does not produce ozone (verified in standardized laboratory  
199 tests, data not shown here). This is an immense advantage over conventional  
200 microbicidal technologies such as plasma and PCO. Also, it consumes  $<20$   
201 Watt-hour of electric energy during its operation.



## 202 3 Discussion and Conclusions

203 ZeBox technology exploits the fact that microbes (bacteria, viruses, spores and  
204 fungi) are naturally charged and therefore can be readily manipulated by an  
205 electric field. Using a non-ionizing electric field, microbicidal surfaces with  
206 three dimensional topography and electro-chemical kill mechanism, ZeBox  
207 achieves significantly higher microbicidal rate compared to other technologies.

208 Knowing the total reduction in microbial load, as shown in figure 4, is  
209 inadequate to gauge ZeBox's efficacy because any level of decontamination  
210 may be achieved given sufficient time. Therefore, an overall microbicidal  
211 efficiency must be determined while factoring in the time of operation as well  
212 as the volume of the room being decontaminated. Towards this end, we may  
213 think in terms of the number of nominal air changes in a room achieved in a  
214 given duration and the consequent reduction in microbial load for each air  
215 change. In time  $t$ ,  $Qt/V$  number of nominal air changes is achieved, where  $Q$   
216 is the air flow rate through ZeBox and  $V$  is the volume of the room. If  $\eta$  is the  
217 corresponding microbicidal efficiency, then  $N_0$  initial number of viable  
218 microbes in the room decreases to  $N = N_0(1 - \eta)^{Qt/V}$  after time  $t$ . Using this  
219 formula and the latest-time data from figure 4 whose ordinate is  $\log_{10} N$ , we  
220 may back-calculate  $\eta$  for a specified time duration. The microbicidal efficiency  
221 of ZeBox lies in the range of 83-99 % for all the tests. Considering the variety  
222 of sensitive and hardy microbes employed, ZeBox is about equally effective  
223 against all of them. Supplementary information S2 provides a theoretical  
224 estimation of the microbicidal efficiency of ZeBox and shows that the efficiency  
225 deduced from experimental data is aligned with it.

226 Airborne microbes of size  $< 2 \mu\text{m}$  can remain suspended in air for  
227 several hours before settling down and therefore must be inactivated to reduce  
228 the transmission of infections. ZeBox technology presents a universal solution  
229 because:

- 230 • Freely floating microbes are trapped and killed with high efficiency,  
231 eliminating the possibility of future growth.
- 232 • The airflow is parallel to antimicrobial surfaces with almost no  
233 resistance; therefore, unlike HEPA filters, it has low energy utilization.
- 234 • There are no chemical emissions or production of free radicals or ozone;  
235 the technology is safe for continuous use in the presence of humans and  
236 animals.
- 237 • It is equally effective for different varieties of sensitive and hardy  
238 microbes.

## 239 Materials and methods

### 240 Challenge tests

241 **A. Test setup** An air-sealed test chamber of dimensions 3 ft  $\times$  4 ft  $\times$  3 ft  
242 (approximately 1000 liters in volume) was built with multiple sampling and  
243 nebulization ports. The environmental parameters such as relative humidity  
244 and temperature could be monitored using a probe located inside the

245 chamber. During experiments, various microorganisms were aerosolized using  
246 a 6-jet collision nebulizer (MESA LABS, BGI) into the chamber, and the  
247 device efficiency was monitored by collecting and measuring microbial  
248 concentration at different time intervals. A second test chamber of dimensions  
249 3ft x 2.5 ft x 1 ft (approximately 220 liters in volume) placed inside a biosafety  
250 cabinet, with similar aerosolization and sampling port configuration, was used  
251 for tests with viruses.

252 **B. Cultivation of test microorganisms** To validate the efficiency of the  
253 decontamination device, *Escherichia coli* (MTCC 40), *Pseudomonas*  
254 *aeruginosa* (MTCC 424), *Staphylococcus aureus* (MTCC 96), *Candida albicans*  
255 (MTCC 584), *Aspergillus fumigatus* (MTCC 2544), *Mycobacterium smegmatis*  
256 (MTCC 6), MS2 coliphage (ATCC 15597-B1) and PhiX 174 coliphage (ATCC  
257 13706-B1) were used. For growing *Escherichia coli*, *Pseudomonas aeruginosa*  
258 and *Staphylococcus aureus*, Luria broth was used. For growing *Candida*  
259 *albicans*, Potato dextrose broth was used, while for *M. smegmatis*,  
260 Middlebrook 7H9 broth was used. For enumeration of *E.coli*, samples were  
261 plated on Luria Bertani agar; Ceftrimide agar was used as a selective for the  
262 growth and isolation of *Pseudomonas aeruginosa*. Ceftrimide inhibits the  
263 growth of many microorganisms while allowing *Pseudomonas aeruginosa* to  
264 develop typical colonies. For quantification of *Staphylococcus*, Mannitol Salt  
265 Agar plates were used. *Candida albicans* and *Aspergillus fumigatus* spores  
266 were enumerated using Rose-Bengal Chloramphenicol Agar plates. Coliphages  
267 were cultivated using standard method described in ATCC manual. For all  
268 microbiological nutrient media were manufactured by HiMedia Laboratories,  
269 India unless mentioned otherwise.

270 **C. Aerosolization of test microbes** A 6-jet Collision nebulizer (MESA  
271 LABS, BGI) was used to aerosolize the test microbes into the test chamber.  
272 Dry air from a compressed air cylinder at a pressure of 10 psi was used to  
273 operate the nebulizer. The nebulizer produces bioaerosols of a 2-5  $\mu\text{m}$  diameter  
274 that allows them to float in the air present in the test chamber for a definite  
275 period. The length of the nebulization period varied depending on the type of  
276 experiment and microorganism, but typically ranged between 30-40 minutes.

277 **D. Sampling of air for viable microbes** The airborne survival of the test  
278 microbe and the activity of the air decontamination devices were determined  
279 by collecting the air from the chamber at the rate of 12.5 liter/min using SKC  
280 biosampler [54], filled with sterile buffer (1x Phosphate buffer saline, pH 7.2).  
281 Collected samples were analyzed to understand the quantity of viable  
282 microorganism present by diluting and plating them onto suitable growth  
283 media. The plated samples were incubated at  $37\pm 2$   $^{\circ}\text{C}$  for bacteria and  $25\pm 2$   
284  $^{\circ}\text{C}$  for fungal species and allowed to grow for 18-48 hours as mentioned in the  
285 ATCC/MTCC manual, individual colonies were enumerated, and the final  
286 concentration of the microbial load was calculated thereafter. For enumerating  
287 coliphages collected from the chamber, Double agar overlay method was used  
288 for subsequent plaque assay [55]. *E. coli* ATCC 15597 and *E. coli* ATCC  
289 13706 were used as a host in plaque assays for MS2 and PhiX174, respectively.  
290 Plaques were counted after 24 hour incubation at  $37\pm 2$   $^{\circ}\text{C}$ .

291 **E. Spot experiments** *E. coli* cells were grown in the standard medium. A  
292 known titre of cells were spotted onto a 25 mm<sup>2</sup> surface and incubated for  
293 various time duration, both with and without electric field. Surfaces were  
294 resuspended in 500  $\mu$ l of sterile 1X PBS, which was then plated on standard  
295 agar plates to enumerate the microbes.

296 **F. Limit of Detection** Microbial enumeration is guided by two parameters,  
297 Limit of Detection (LOD) and Limit of Quantification (LOQ). For the present  
298 assays used to quantify the microbial load inside the test chamber, the LOD  
299 was 10 CFU for bacterial and fungal load and 5 PFU for viral load. However,  
300 LOD is always less than LOQ [56]. In many of our experimental analysis, post  
301 operating ZeBox device, the microbial detected numbers were in around LOD  
302 and hence, the exact LOQ was often indeterminant.

303 **G. SEM analysis of trapped microbes to decipher the mechanism of**  
304 **kill** 3D surfaces were stripped off from the electrode plates post operating  
305 the device against *E.coli* under challenge test under various time course, and  
306 treated with 2.5% glutaraldehyde in 0.1 M phosphate buffer (pH 7.2) for 24 hrs  
307 at 4 °C. The samples were dehydrated in series of graded ethanol solutions and  
308 subjected to critical point drying with CPD unit. The analyzed samples were  
309 mounted over the stud with double-sided carbon conductivity tape, and a thin  
310 layer of gold coat over the samples was done by using an automated sputter  
311 coater (EMITECK K550X Sputter Coater from EM Scientific Services) for 3  
312 minutes and analyzed under Field Emission Scanning Electron Microscope  
313 (MERLIN Compact VP from M/s.Carl Ziess). The set parameters were:  
314 Working Distance= 5-6 mm, EHT range= 2-4 kV, Range of Magnification= 70  
315 KX, detectors=SE2 And InLens, machine under high vacuum.

## 316 **Field tests**

317 **H. Air sample collection** A working tissue culture laboratory in a  
318 national stem cell research facility was chosen for study. This laboratory was  
319 situated in a building which had central airconditioning but the absence of a  
320 HEPA-enabled air handling unit resulted in frequent contamination of tissue  
321 culture samples. A handheld air sampler (SAS Super 100) was used, which  
322 could sample 100 liters of air per minute. Tryptic Soy Agar and Sabouraud  
323 dextrose agar plates were used to sample bacteria and fungi, respectively from  
324 the air. A fixed volume of air was sampled using the bio-sampler. Plates were  
325 placed in and removed from the bio-sampler in an aseptic manner. Plates were  
326 incubated at 25 $\pm$ 2 °C (for fungal cultivation) and 37 $\pm$ 2 °C (for bacterial  
327 cultivation) for 48 hours. Post-incubation, the number of colonies appeared  
328 were enumerated and converted to CFU/m<sup>3</sup> using statistical conversion  
329 provided by the manufacturer. Control plates were used to ensure the sterility  
330 of the entire process.

## 331 **Acknowledgments**

332 The authors acknowledge the Electron Microscopy Facility at Bangalore Life  
333 Science Cluster (C-CAMP, NCBS, inStem) for technical assistance in Scanning

334 Electron microscopy imaging. Financial assistance was received from  
335 Department of Biotechnology- Biotechnology Industry Research Assistance  
336 Council (DBT-BIRAC), Govt. of India under Small Business Innovation  
337 Research Initiative (SBIRI) (Grant no. BT/SBIRI1372/31/16), COVID-19  
338 Consortium (Grant no. BT/COVID0025/01/20), and from Karnataka  
339 Innovation and Technology Society (KITS) Department of Electronics, IT, Bt  
340 and S&T, Government of Karnataka, under Ideas2PoC Grant.

## 341 Author contributions

342 KSP, DK carried out experiments designed and supervised by SD, AG. DM,  
343 NH carried out theoretical and numerical work supervised by JA, GT. JV,  
344 KSR, SD, AG conceptualized and designed the technology. JV, AG secured  
345 and managed funding.

## 346 Competing interests

347 JA, GT declare no competing interests. SD is Director on Biomoneta board.  
348 The rest of the authors are, or were, employees of Biomoneta Research Private  
349 Limited, Bangalore, India 560065.

## 350 References

- 351 [1] Zhang Y, Mo J, Li Y, Sundell J, Wargocki P, Zhang J, Little JC, Corsi R,  
352 Deng Q, Leung MH, Fang L. Can commonly-used fan-driven air cleaning  
353 technologies improve indoor air quality? A literature review. *Atmospheric*  
354 *Environment*. 2011 Aug;45(26):4329-43.
- 355 [2] Liu G, Xiao M, Zhang X, Gal C, Chen X, Liu L, Pan S, Wu J, Tang L,  
356 Clements-Croome D. A review of air filtration technologies for sustainable  
357 and healthy building ventilation. *Sustainable cities and society* 2017  
358 Jul;32:375–396.
- 359 [3] Afshari A, Ekberg L, Forejt L, Mo J, Rahimi S, Siegel J, Chen W,  
360 Wargocki P, Zurami S, Zhang J. Electrostatic Precipitators as an Indoor  
361 Air Cleaner—A Literature Review. *Sustainability*. 2020 Jan;12(21):8774.
- 362 [4] Simmons RB, Crow SA. Fungal colonization of air filters for use in  
363 heating, ventilating, and air conditioning (HVAC) systems. *Journal of*  
364 *industrial microbiology*. 1995 Jan;14(1):41-5.
- 365 [5] Kemp SJ, Kuehn TH, Pui DY, Vesley D, Streifel AJ. Filter collection  
366 efficiency and growth of microorganisms on filters loaded with outdoor  
367 air. *ASHRAE Transactions*. 1995 Jan:228-38.
- 368 [6] Maus R, Goppelsröder A, Umhauer H. Survival of bacterial and mold  
369 spores in air filter media. *Atmospheric Environment*. 2001  
370 Jan;35(1):105-13.

- 371 [7] Forthomme A, Joubert A, Andrès Y, Simon X, Duquenne P, Bemer D, Le  
372 Coq L. Microbial aerosol filtration: Growth and release of a  
373 bacteria–fungi consortium collected by fibrous filters in different operating  
374 conditions. *Journal of aerosol science*. 2014 Jun;72:32-46.
- 375 [8] Morisseau K, Joubert A, Le Coq L, Andres Y. Quantification of the  
376 fungal fraction released from various preloaded fibrous filters during a  
377 simulated ventilation restart. *Indoor air*. 2017 May;27(3):529-38.
- 378 [9] Stephens B, Novoselac A, Siegel JA. The effects of filtration on pressure  
379 drop and energy consumption in residential HVAC systems (RP-1299).  
380 *HVAC&R Research*. 2010 May;16(3):273-94.
- 381 [10] Xu T, Lan CH, Jeng MS. Performance of large fan-filter units for  
382 cleanroom applications. *Building and Environment*. 2007  
383 Jun;42(6):2299-304.
- 384 [11] Boelter KJ, Davidson JH. Ozone generation by indoor, electrostatic air  
385 cleaners. *Aerosol science and technology*. 1997 Jan 1;27(6):689-708.
- 386 [12] Gerone PJ, Couch RB, Keefer GV, Douglas RG, Derrenbacher EB,  
387 Knight V. Assessment of experimental and natural viral aerosols.  
388 *Bacteriological reviews*. 1966 Sep;30(3):576.
- 389 [13] Mainelis G. Collection of airborne microorganisms by electrostatic  
390 precipitation. *Aerosol Science and Technology*. 1999 Feb;30(2):127-44.
- 391 [14] Ghosh B, Lal H, Srivastava A. Review of bioaerosols in indoor  
392 environment with special reference to sampling, analysis and control  
393 mechanisms. *Environment international*. 2015 Dec;85:254-72.
- 394 [15] Zhang L, Luo J, Menkhaus TJ, Varadaraju H, Sun Y, Fong H.  
395 Antimicrobial nano-fibrous membranes developed from electrospun  
396 polyacrylonitrile nanofibers. *Journal of membrane science*. 2011  
397 Mar;369(1-2):499-505.
- 398 [16] Mei Y, Yao C, Fan K, Li X. Surface modification of polyacrylonitrile  
399 nanofibrous membranes with superior antibacterial and easy-cleaning  
400 properties through hydrophilic flexible spacers. *Journal of membrane  
401 science*. 2012 Nov;417:20-7.
- 402 [17] Zhong Z, Xu Z, Sheng T, Yao J, Xing W, Wang Y. Unusual air filters  
403 with ultrahigh efficiency and antibacterial functionality enabled by ZnO  
404 nanorods. *ACS applied materials & interfaces*. 2015 Sep;7(38):21538-44.
- 405 [18] Liu S, Zhao J, Ruan H, Wang W, Wu T, Cui W, Fan C. Antibacterial  
406 and anti-adhesion effects of the silver nanoparticles-loaded poly  
407 (L-lactide) fibrous membrane. *Materials Science and Engineering: C*. 2013  
408 Apr;33(3):1176-82.
- 409 [19] Mei Y, Yao C, Li X. A simple approach to constructing antibacterial and  
410 anti-biofouling nanofibrous membranes. *Biofouling*. 2014  
411 Mar;30(3):313-22.

- 412 [20] Jeong SB, Heo KJ, Lee BU. Antimicrobial Air Filters Using Natural Sea  
413 Salt Particles for Deactivating Airborne Bacterial Particles. *International*  
414 *journal of environmental research and public health*. 2020 Jan;17(1):190.
- 415 [21] Xu P, Kujundzic E, Peccia J, Schafer MP, Moss G, Hernandez M, Miller  
416 SL. Impact of environmental factors on efficacy of upper-room air  
417 ultraviolet germicidal irradiation for inactivating airborne mycobacteria.  
418 *Environmental science & technology*. 2005 Dec;39(24):9656-64.
- 419 [22] Ko G, First MW, Burge HA. Influence of relative humidity on particle  
420 size and UV sensitivity of *Serratia marcescens* and *Mycobacterium bovis*  
421 BCG aerosols. *Tubercle and Lung Disease*. 2000 Aug;80(4-5):217-28.
- 422 [23] Tang JW. The effect of environmental parameters on the survival of  
423 airborne infectious agents. *Journal of the Royal Society Interface*. 2009  
424 Dec 6;6(suppl-6):S737-46.
- 425 [24] Memarzadeh F, Olmsted RN, Bartley JM. Applications of ultraviolet  
426 germicidal irradiation disinfection in health care facilities: effective  
427 adjunct, but not stand-alone technology. *American journal of infection*  
428 *control*. 2010 Jun;38(5):S13-24.
- 429 [25] Mamahlodi MT. Potential benefits and harms of the use of UV radiation  
430 in transmission of tuberculosis in South African health facilities. *Journal*  
431 *of public health in Africa*. 2019 May;10(1).
- 432 [26] Nardell EA, Bucher SJ, Brickner PW, Wang C, Vincent RL,  
433 Becan-McBride K, James MA, Michael M, Wright JD. Safety of  
434 upper-room ultraviolet germicidal air disinfection for room occupants:  
435 results from the Tuberculosis Ultraviolet Shelter Study. *Public health*  
436 *reports*. 2008 Jan;123(1):52-60.
- 437 [27] Zaffina S, Camisa V, Lembo M, Vinci MR, Tucci MG, Borra M,  
438 Napolitano A, Cannatà V. Accidental exposure to UV radiation produced  
439 by germicidal lamp: case report and risk assessment. *Photochemistry and*  
440 *photobiology*. 2012 Jul;88(4):1001-4.
- 441 [28] Vaidya MU, Gangakhedkar GR, Shetty AN, Waghalkar PV. A rare  
442 occurrence of accidental exposure to UV radiation among operating  
443 theatre personnel. *Indian journal of anaesthesia*. 2020 Mar;64(3):230.
- 444 [29] Brickner PW, Vincent RL. Ultraviolet Germicidal Irradiation Safety  
445 Concerns: A Lesson from the Tuberculosis Ultraviolet Shelter Study  
446 Murphy's Law Affirmed. *Photochemistry and photobiology*. 2013  
447 Jul;89(4):819-21.
- 448 [30] Kujundzic E, Matalakah F, Howard CJ, Hernandez M, Miller SL. UV air  
449 cleaners and upper-room air ultraviolet germicidal irradiation for  
450 controlling airborne bacteria and fungal spores. *Journal of Occupational*  
451 *and Environmental Hygiene*. 2006 Oct;3(10):536-46.
- 452 [31] Nakpan W, Yermakov M, Indugula R, Reponen T, Grinshpun SA.  
453 Inactivation of bacterial and fungal spores by UV irradiation and gaseous  
454 iodine treatment applied to air handling filters. *Science of The Total*  
455 *Environment*. 2019 Jun;671:59-65.



- 456 [32] Bahri M, Haghghat F. Plasma-B ased Indoor Air Cleaning Technologies:  
457 The State of the Art Review. CLEAN–Soil, Air, Water. 2014  
458 Dec;42(12):1667-80.
- 459 [33] Tang X, Feng F, Ye L, Zhang X, Huang Y, Liu Z, Yan K. Removal of  
460 dilute VOCs in air by post-plasma catalysis over Ag-based composite  
461 oxide catalyts. Catalysis today. 2013 Aug;211:39-43.
- 462 [34] Mamaghani AH, Haghghat F, Lee CS. Photocatalytic oxidation  
463 technology for indoor environment air purification: the state-of-the-art.  
464 Applied Catalysis B: Environmental. 2017 Apr;203:247-69.
- 465 [35] Chen F, Yang X, Mak HK, Chan DW. Photocatalytic oxidation for  
466 antimicrobial control in built environment: a brief literature overview.  
467 Building and environment. 2010 Aug;45(8):1747-54.
- 468 [36] Zhong L, Haghghat F. Photocatalytic air cleaners and materials  
469 technologies–abilities and limitations. Building and Environment. 2015  
470 Sep;91:191-203.
- 471 [37] Mo J, Zhang Y, Xu Q, Zhu Y, Lamson JJ, Zhao R. Determination and  
472 risk assessment of by-products resulting from photocatalytic oxidation of  
473 toluene. Applied Catalysis B: Environmental. 2009 Jul;89(3-4):570-6.
- 474 [38] Wei K, Zou Z, Yao M. Charge levels and Gram ( $\pm$ ) fractions of  
475 environmental bacterial aerosols. Journal of aerosol science. 2014  
476 Aug;74:52-62.
- 477 [39] Shen F, Kai W, Yao M. Negatively and positively charged bacterial  
478 aerosol concentration and diversity in natural environments. Chinese  
479 Science Bulletin. 2013 Sep;58(26):3169-76.
- 480 [40] Tosun I, Uner D, Ozgen C. Critical Reynolds number for Newtonian flow  
481 in rectangular ducts. Industrial & engineering chemistry research. 1988  
482 Oct;27(10):1955-7.
- 483 [41] Kundu P.K., Cohen I.M., Hu H.H. Fluid Mechanics. Academic press,  
484 London (pp. 516); 2008.
- 485 [42] Kassab AS, Ugaz VM, King MD, Hassan YA. High resolution study of  
486 micrometer particle detachment on different surfaces. Aerosol Science and  
487 Technology. 2013 Apr;47(4):351-60.
- 488 [43] Soltani M, Ahmadi G. On particle adhesion and removal mechanisms in  
489 turbulent flows. Journal of Adhesion Science and Technology. 1994  
490 Jan;8(7):763-85.
- 491 [44] Mainelis G, Willeke K, Baron P, Reponen T, Grinshpun SA, Górný RL,  
492 Trakumas S. Electrical charges on airborne microorganisms. Journal of  
493 Aerosol Science. 2001 Sep;32(9):1087-110.
- 494 [45] Lee SA, Willeke K, Mainelis G, Adhikari A, Wang H, Reponen T,  
495 Grinshpun SA. Assessment of electrical charge on airborne  
496 microorganisms by a new bioaerosol sampling method. Journal of  
497 occupational and environmental hygiene. 2004 Mar;1(3):127-38.



- 498 [46] Hugo WB. The mode of action of antibacterial agents. *Journal of Applied*  
499 *Bacteriology*. 1967 Apr;30(1):17-50.
- 500 [47] Denyer SP. Mechanisms of action of antibacterial biocides. *International*  
501 *biodeterioration & biodegradation*. 1995 Oct;36(3-4):227-45.
- 502 [48] McDonnell G, Russell AD. Antiseptics and disinfectants: activity, action,  
503 and resistance. *Clinical microbiology reviews*. 1999 Jan;12(1):147-79.
- 504 [49] Tischer M, Pradel G, Ohlsen K, Holzgrabe U. Quaternary ammonium  
505 salts and their antimicrobial potential: targets or nonspecific  
506 interactions?. *ChemMedChem*. 2012 Jan;7(1):22-31.
- 507 [50] Kotnik T, Rems L, Tarek M, Miklavčič D. Membrane electroporation and  
508 electropermeabilization: mechanisms and models. *Annual review of*  
509 *biophysics*. 2019 May;48:63-91.
- 510 [51] Jose S, Phadke KS, Venkatraman J, Krishna B, Sampath S, Datta S,  
511 Nagaraj S, Ghatak A. Trap and kill of environmental microbes:  
512 Validation of a novel decontamination technology in Hospital ICU setting.  
513 *medRxiv*. 2020 Jan.
- 514 [52] Li DT, Samaranayake LP, Leung YY, Neelakantan P. Facial protection in  
515 the era of COVID-19: A narrative review. *Oral diseases*. 2020 Jun 7.
- 516 [53] Coulliette AD, Perry KA, Fisher EM, Edwards JR, Shaffer RE,  
517 Noble-Wang J. MS2 coliphage as a surrogate for 2009 pandemic influenza  
518 A (H1N1) virus (pH1N1) in surface survival studies on N95 filtering  
519 facepiece respirators. *Journal of the International Society for Respiratory*  
520 *Protection*. 2014 Jan;21(1):14.
- 521 [54] Li J, Leavey A, Wang Y, O'Neil C, Wallace MA, Burnham CA, Boon AC,  
522 Babcock H, Biswas P. Comparing the performance of 3 bioaerosol  
523 samplers for influenza virus. *Journal of aerosol science*. 2018  
524 Jan;115:133-45.
- 525 [55] Kropinski AM, Mazzocco A, Waddell TE, Lingohr E, Johnson RP.  
526 Enumeration of bacteriophages by double agar overlay plaque assay.  
527 *In: Bacteriophages 2009* (pp. 69-76). Humana Press.
- 528 [56] Armbruster DA, Pry T. Limit of blank, limit of detection and limit of  
529 quantitation. *The clinical biochemist reviews*. 2008 Aug;29(Suppl 1):S49.

## 530 Supplementary information

531 **S1. Range of microbes.** To analyze microbe's motion in laminar flow  
532 between electrode-plates we adopt the following approximations: (1) The flow  
533 is identical to that between infinitely wide plates, which is justified because  
534  $W/H \gg 1$ , where  $H$  is the gap between electrode-plates and  $W$  is their width  
535 (perpendicular to the flow direction); (2) The flow is fully developed, which is  
536 justified because  $L/H \gg 1$ , where  $L$  is the length of electrode-plates along the  
537 flow direction; (3) The microbes move with the flow except when electric force  
538 acts on them, which is justified because the Stokes number of microbes (a  
539 measure of its inertial response to changes in the flow) is  $\ll 1$ ; (4) Self weight  
540 of microbes is negligible compared to the electric forces acting on them,  
541 because of their extremely small size ( $< 5 \mu\text{m}$ ).

542 The orientation of our coordinate system is shown in figure 1. A steady,  
543 unidirectional, incompressible, fully-developed flow is governed by [1]:

$$\frac{du}{dx} = 0 \quad (\text{Mass conservation}) \quad (1)$$

$$\frac{dp}{dx} = \mu \frac{d^2u}{dz^2} \quad (\text{Momentum conservation}) \quad (2)$$

544 where  $u$  is the flow velocity along  $X$  direction,  $p$  is pressure and  $\mu$  is dynamic  
545 viscosity of the fluid. Since, subject to our assumptions,  $u$  depends only on  $z$ ,  
546 mass conservation in Eqn. 1 is automatically satisfied. Since the flow is  
547 induced by imposing a pressure difference between the ends of the  
548 electrode-plates, the pressure gradient  $dp/dx$  is a constant. Therefore,  
549 momentum conservation in Eqn. 2 is satisfied if  $u$  is a quadratic function of  $z$ .  
550 We assume it to be of the form,  $u = Az(H - z)$ , because this automatically  
551 satisfies the no-slip boundary condition on the electrode-plates located at  
552  $z = 0, H$ . The constant  $A$  is determined by computing the volumetric flow rate  
553 and equating it to the known value  $Q$ ,  $W \int_0^H dz u = Q$ , which yields:

$$u(z) = \frac{6Q}{WH^3} z(H - z) \quad (3)$$

554 where  $Q$  is the volumetric flow rate of air between the electrode-plates. The  
555 flow velocity varies only along  $Z$  direction, being maximum midway between  
556 the plates and zero at the plates themselves (no-slip condition). Because the  
557 Reynolds number of microbe's motion is  $\ll 1$ , due to its small size and small  
558 speeds, only Stokes drag force is exerted by the ambient fluid,  $F_{\text{drag}} = 6\pi\mu wa$ ,  
559 where  $\mu$  is the dynamic viscosity of air. We have assumed that the microbe  
560 can be approximated by an equivalent sphere of radius  $a$ . The drag  
561 counterbalances the electric force on the microbe,  $F_{\text{electric}} = qE$ , where  $q$  is the  
562 surface charge on the microbe and  $E$  is the strength of the applied electric  
563 field. Equating the two forces yields for the settling velocity:

$$w = \frac{qE}{6\pi\mu a} \quad (4)$$

564 While drifting towards the electrode-plate the microbe also travels a  
565 distance  $R$  in the flow direction, which we call its "range", refer figure 1. If  $z_0$

566 is the initial distance of the microbe from the attracting electrode-plate at its  
 567 entrance  $x = 0$ , then the time  $T$  needed for the microbe to hit the  
 568 electrode-plate is,  $T = z_0/w$ . After time  $t$ , the vertical location of the microbe  
 569 initially located at  $z_0$  will be  $z = z_0 - wt$ . Then, from eqn. 3, the microbe's  
 570 streamwise speed at that time will be  $u(z_0 - wt)$ . The microbe will hit the  
 571 electrode-plate in time  $T = z_0/w$  (assuming sufficient plate length). Therefore  
 572 the range of the microbe beginning at location  $z_0$  is given by  
 573  $R(z_0) = \int_0^T dt u(z_0 - wt)$ . Changing the integration variable to  $z = z_0 - wt$   
 574 transforms the integral to:  $R(z_0) = w^{-1} \int_0^{z_0} dz u(z)$ . Substituting from eqn. 3  
 575 and integrating yields:

$$R(z_0) = \frac{6Qz_0^2}{WH^3w} \left( \frac{H}{2} - \frac{z_0}{3} \right), \quad 0 \leq z_0 \leq H \quad (5)$$

576 The microbe that is farthest from the attracting electrode-plate, i.e. at  
 577  $z_0 = H$ , has the maximum range:

$$R_{\max} = \frac{Q}{Ww} \quad (6)$$

578 All the microbes entering ZeBox will hit the electrode-plate if its length  
 579 is not less than the maximum range of the microbes, i.e. if  $L \geq R_{\max}$ . Eq 5 for  
 580 the range is visualized more easily if we divide it through by  $R_{\max}$ , Eq 6, and  
 581 rewrite it in the following dimensionless form:

$$\frac{R}{R_{\max}} = 6 \left( \frac{z_0}{H} \right)^2 \left( \frac{1}{2} - \frac{(z_0/H)}{3} \right), \quad 0 \leq \frac{z_0}{H} \leq 1 \quad (7)$$

582 Assuming that all the trapped microbes are killed, Eq 7 plotted in  
 583 supplementary figure 7 completely determines the microbicidal efficiency of  
 584 ZeBox, as per the present model. Here, "microbicidal efficiency" is defined as  
 585 the fraction of microbes entering electrode-plates that hit it and are  
 586 inactivated, assuming a uniform distribution at the entrance. Using  
 587 supplementary figure 7, the microbicidal efficiency is found as follows. We first  
 588 compute  $L/R_{\max}$  given the operating parameters. If  $L/R_{\max} \geq 1$ , then the  
 589 microbicidal efficiency is of course 100%. Otherwise, we locate its value on the  
 590 vertical axis of supplementary figure 7 and using the curve find the  
 591 corresponding value on the horizontal axis, which gives the microbicidal  
 592 efficiency. Therefore,  $L/R_{\max}$  alone determines the microbicidal efficiency of  
 593 ZeBox according to the present model.

594 **S2. Microbicidal efficiency of ZeBox.** A microbe in an ionic solution is  
 595 surrounded by a diffuse double layer of ions of molecular dimensions. The  
 596 Debye length ( $\kappa^{-1}$ ), which is a measure of the thickness of the double layer,  
 597 lies in the range:  $1 < \kappa^{-1} < 10$  nm [2]. Since the microbe's size  $a \sim 1$   $\mu$ m,  
 598  $\kappa a \gg 1$  for microbes. The magnitude of the measured zeta potential ( $\zeta$ ) of  
 599 microbes in phosphate-buffer solution lies in the range 1 to 30 mV. Considering  
 600 the worst-case-scenario, we may take  $\zeta = 1$  mV and  $\kappa a = 100$ . The number of  
 601 elementary charges  $n$  on the microbe may then be estimated as [2]:

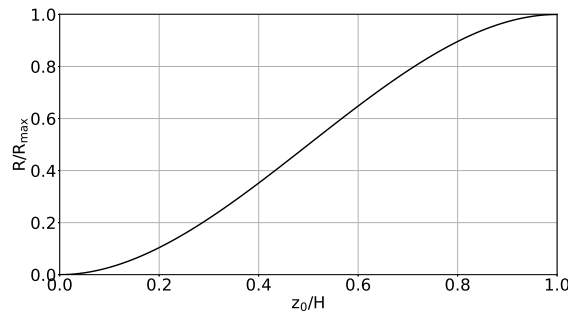

Supplementary figure 7: **Range of a microbe.** A microbe initially at distance  $z_0/H$  from the attracting electrode-plate hits it at a distance  $R/R_{\max}$ .

$$n \approx \frac{4\pi\epsilon_r\epsilon_0\zeta a(1 + \kappa a)}{e} \quad (8)$$

602 where  $\epsilon_r$  is the dielectric constant of the solution,  $\epsilon_0 = 8.9 \times 10^{-12}$  F/m is the  
603 permittivity of vacuum and  $e = 1.6 \times 10^{-19}$ C is the magnitude of the  
604 elementary charge. Eqn. 8 is derived from the linearized Poisson-Boltzmann  
605 equation governing the variation of electric potential due to distribution of  
606 ions in the diffuse layer surrounding a charged sphere; the linearization is a  
607 consequence of the Debye-Hückel approximation which is applicable when zeta  
608 potential is small (compared to  $\sim 25$  mV at 25  $^{\circ}$ C) [2]. For a measured  
609 dielectric constant of 78.5 for the buffer solution, Eqn. 8 reveals  $n > 5000$   
610 elementary charges. Even allowing for an order-of-magnitude error and  
611 assuming  $n > 500$  instead, Eqn. 4 yields a settling velocity of  $w > 7$  cm/s, for  
612  $E = 3$  kV/cm in air.

613 Since the flow rate between a pair of electrode-plates is  $Q < 3$  cfm and  
614 the electrode-plate width  $W = 10.9$  cm, Eqn. 6 shows that  $R_{\max} < 19$  cm. In  
615 comparison, ZeBox employs 30 cm long electrode-plates. Although in theory it  
616 implies 100 % microbicidal efficiency for ZeBox, the present model is only  
617 approximate because it does not account for the effects of possible turbulence  
618 in the flow and slippage of microbes on the surface. In reality, as mentioned in  
619 the Results section, we obtain 83-99 % microbicidal efficiency for ZeBox as  
620 deduced from the measured microbial load reduction.

## 621 References

- 622 [1] Kundu P.K., Cohen I.M., Hu H.H. Fluid Mechanics. Academic press,  
623 London (pp. 516); 2008.
- 624 [2] Hiemenz P. C., Rajagopalan R. Principles of Colloid and Surface  
625 Chemistry.
